# Supplementary material for: Antiferromagnetic semiconductor Eu3Sn2P4 with Sn–Sn dimer and crown-wrapped Eu
Source: Royal Society of Chemistry journal article supplement (doi:10.1039/c9tc03557e), 2019-01-01
Supplement: c9tc03557e1.pdf [file c9tc03557e1.pdf]

## Antiferromagnetic Semiconductor $\text{Eu}_3\text{Sn}_2\text{P}_4$ with Sn-Sn Dimer and Crown-wrapped Eu

*Joanna Blawat*<sup>1,2</sup>, *Przemyslaw Swatek*<sup>3,4,5</sup>, *Xin Gui*<sup>1</sup>, *Rongying Jin*<sup>2\*</sup>, *Weiwei Xie*<sup>1\*</sup>

<sup>1</sup> Department of Chemistry, Louisiana State University, Baton Rouge, LA 70803, USA

<sup>2</sup> Department of Physics and Astronomy, Louisiana State University, Baton Rouge, LA 70803, USA

<sup>3</sup> Division of Materials Science and Engineering, Ames Laboratory, Ames, Iowa 50011, USA

<sup>4</sup> Department of Physics and Astronomy, Iowa State University, Ames, Iowa 50011, USA

<sup>5</sup> Institute of Low Temperature and Structure Research, Polish Academy of Sciences, P.O. Box 1410, 50-950 Wroclaw, Poland

### Supplemental Information

|                                                                                                |    |
|------------------------------------------------------------------------------------------------|----|
| <b>Table S1.</b> Anisotropic thermal displacement for $\text{Eu}_3\text{Sn}_2\text{P}_4$ ..... | S2 |
| <b>Table S2.</b> Chemical composition obtained from EDX analysis .....                         | S3 |
| <b>Figure S1.</b> SEM images .....                                                             | S4 |

**Table S1.** Anisotropic thermal displacement for  $\text{Eu}_3\text{Sn}_2\text{P}_4$ 

| Atom | $U_{11}$  | $U_{22}$  | $U_{33}$  | $U_{23}$   | $U_{13}$   | $U_{12}$   |
|------|-----------|-----------|-----------|------------|------------|------------|
| Eu1  | 0.0102(3) | 0.0073(3) | 0.0102(3) | -0.0006(2) | 0.0000     | 0.0000     |
| Eu2  | 0.0110(1) | 0.0098(1) | 0.0090(1) | 0.0001(1)  | -0.0001(1) | 0.0005(1)  |
| Eu3  | 0.0117(2) | 0.0091(2) | 0.0109(2) | 0.0008(2)  | 0.0000     | 0.0000     |
| Eu4  | 0.0120(2) | 0.0104(2) | 0.0111(2) | -0.0008(2) | 0.0000     | 0.0000     |
| Eu5  | 0.0111(1) | 0.0097(2) | 0.0098(1) | -0.0002(1) | -0.0001(1) | -0.0008(1) |
| Eu6  | 0.0191(3) | 0.0119(3) | 0.0156(3) | -0.0009(3) | 0.0000     | 0.0000     |
| Eu7  | 0.0138(1) | 0.0099(1) | 0.0127(1) | 0.0003(1)  | -0.0025(1) | -0.0004(1) |
| Sn1  | 0.0104(1) | 0.0075(2) | 0.0083(2) | -0.0003(2) | -0.0002(1) | 0.0003(2)  |
| Sn2  | 0.0102(2) | 0.0078(2) | 0.0083(2) | -0.0002(1) | -0.0003(1) | 0.0002(1)  |
| Sn3  | 0.0105(2) | 0.0074(2) | 0.0086(2) | 0.0004(1)  | -0.0002(2) | -0.0005(2) |
| P1   | 0.0083(1) | 0.0114(1) | 0.0093(1) | 0.0009(8)  | 0.0000     | 0.0000     |
| P2   | 0.0098(7) | 0.0099(7) | 0.0104(7) | -0.0005(6) | 0.0004(5)  | 0.0019(6)  |
| P3   | 0.0127(7) | 0.0084(6) | 0.0087(7) | 0.0003(6)  | 0.0007(6)  | -0.0013(6) |
| P4   | 0.0091(1) | 0.0116(1) | 0.0092(1) | -0.0025(8) | 0.0000     | 0.0000     |
| P5   | 0.0109(8) | 0.0090(7) | 0.0123(8) | 0.0016(6)  | 0.0020(5)  | 0.0005(6)  |
| P6   | 0.0105(7) | 0.0101(7) | 0.0105(7) | -0.0004(6) | -0.0019(6) | 0.0013(6)  |
| P7   | 0.0105(7) | 0.0075(7) | 0.0118(8) | 0.0018(6)  | -0.0016(6) | -0.0010(6) |

**Table S2** Chemical composition obtained from EDX analysis

|        | <b>Crystal 1</b><br>Atomic %<br>Eu : Sn : P | <b>Crystal 2</b><br>Atomic %<br>Eu : Sn : P |
|--------|---------------------------------------------|---------------------------------------------|
| Spot 1 | 30(2):19(3):51(7)                           | 32(2):19(3):47(7)                           |
| Spot 2 | 30(2):19(3):51(7)                           | 29(2):18(3):53(7)                           |
| Spot 3 | 30(2):19(3):51(7)                           | 29(2):18(3):53(7)                           |
| Spot 4 | 28(2):18(3):54(7)                           | 31(2):19(3):50(7)                           |
| Spot 5 | 30(2):19(3):51(7)                           | -                                           |
| Spot 6 | 36(2):23(3):41(7)                           | -                                           |

**Figure S1** (a) and (b) SEM images for crystal 1 and crystal 2, respectively. (c) EDX spectrum

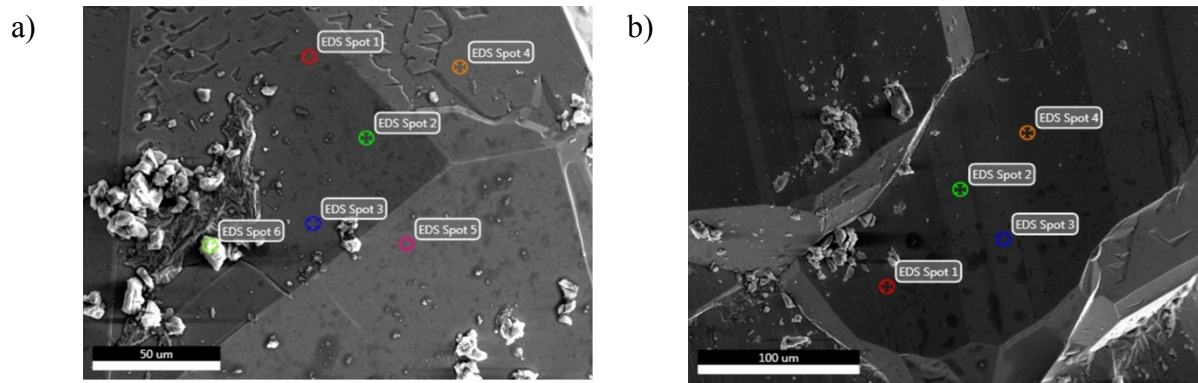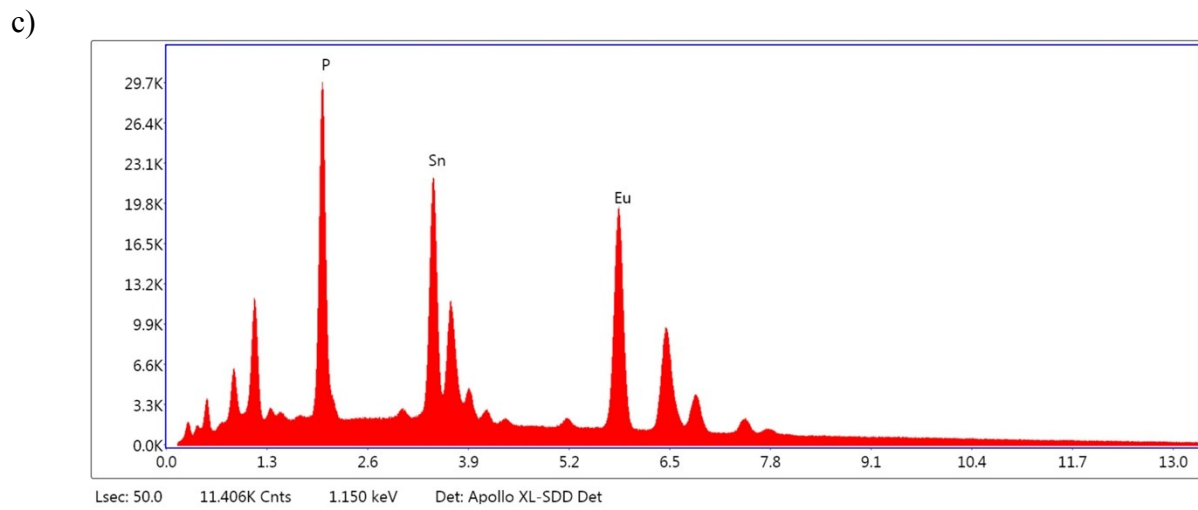

obtained for spot 1 on crystal 1
